# Supplementary material for: From red selenium to cuprous selenide: a novel and facile route to a high performance metal selenide cathode for sensitized solar cells
Source: Royal Society of Chemistry journal article supplement (doi:10.1039/c4ta02545h), 2014-06-20
Supplement: c4ta02545h1.pdf [file c4ta02545h1.pdf]

## From Red Selenium to Cuprous Selenide: Novel and Facile Route to High Performance Metal Selenide Cathode for Sensitized Solar Cells

### Supporting information.

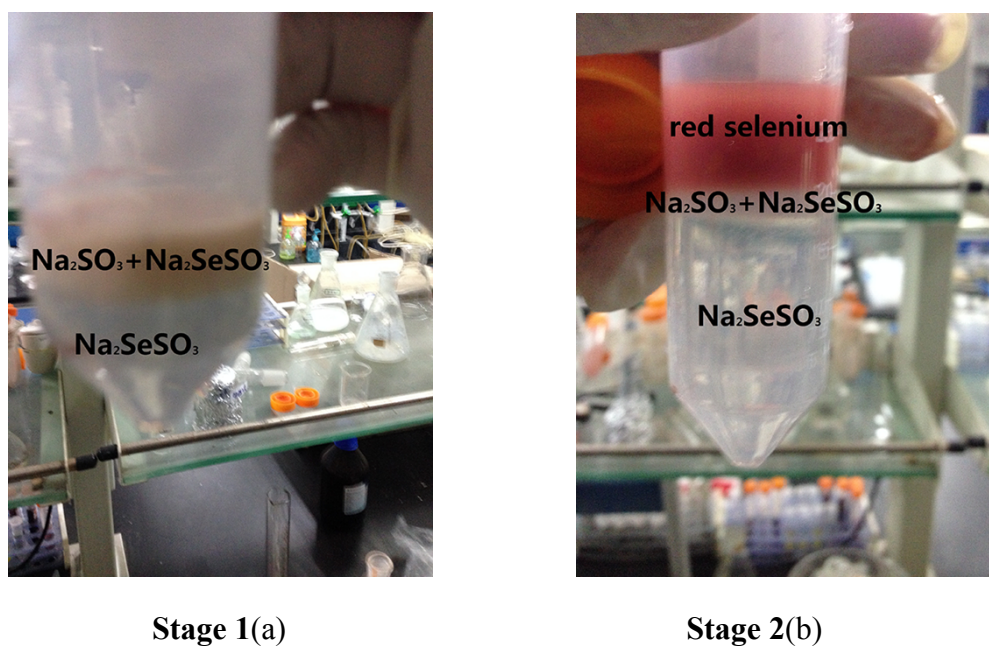

Figure R1: evolution photographs of  $\text{Na}_2\text{SeSO}_3$  aqueous solution with addition of ethanol (a) immediately and small amount; (b) after 30s and more ethanol.

As shown in (Figure R1a, instead of spraying ethanol onto glass substrate, we slowly added ethanol to the  $\text{Na}_2\text{SeSO}_3$  aqueous solution. The solution appears stratification immediately after the ethanol addition. Simultaneously, white precipitate merges at the ethanol-water interfaces. This white precipitate should be  $\text{Na}_2\text{SO}_3$  or mixed  $\text{Na}_2\text{SO}_3 + \text{Na}_2\text{SO}_4$  due to its smaller solubility in ethanol than in water. Due to the precipitation of  $\text{Na}_2\text{SO}_3$ , there is less soluble  $\text{Na}_2\text{SO}_3$  to stabilize  $\text{Se}^{2-}$  in the solution, leading to the oxidation of  $\text{Se}^{2-}$  to form amorphous red selenium in ethanol.

With further addition of ethanol and time flow, the red selenium mainly forms and

disperses in ethanol as depicted in stage2, figure R1b. The white layer mentioned is still obvious at water-ethanol interfaces.

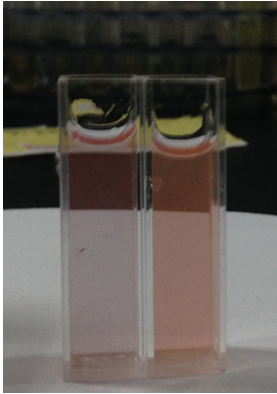

Figure R2a

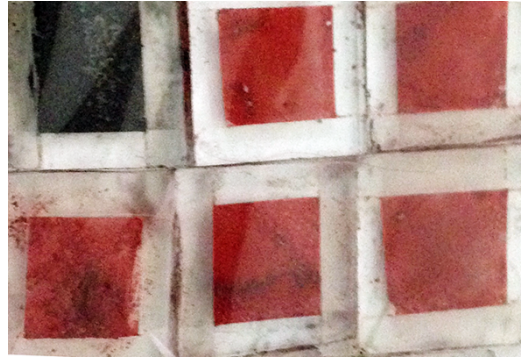

Figure R2b

(Figure R2) Left (a) red selenium dispersed in water after 3days with different sizes (prepared with ethanol (left) prepared with methanol (right)). (b)Right: red selenium on FTO substrate after 3days and one turned to dark cuprous selenite counter electrode at up-left corner.
